# Supplementary material for: A family of lanthanide metal–organic frameworks based on a redox-active tetrathiafulvalene-dicarboxylate ligand showing slow relaxation of magnetisation and electronic conductivity
Source: Royal Society of Chemistry journal article supplement (doi:10.1039/d1dt01851e), 2021-01-01
Supplement: d1dt01851e1.pdf [file d1dt01851e1.pdf]

## Electronic Supplementary Information (ESI)

### Family of Lanthanide Metal-Organic Frameworks Based on Redox-Active Tetrathiafulvalene-Dicarboxylate Ligand Showing Slow Relaxation of Magnetisation and Electronic Conductivity

Jun-Jie Hu<sup>a</sup>, Yu-Guang Li<sup>a</sup>, He-Rui Wen<sup>\*, a</sup>, Sui-Jun Liu<sup>a</sup>, Yan Peng<sup>a</sup> and Cai-Ming Liu<sup>\*, b</sup>

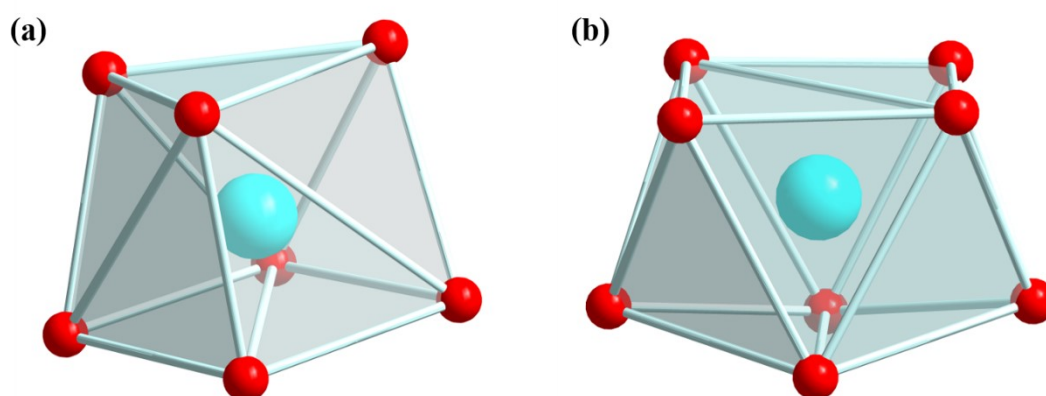

Figure S1. Coordination geometry around of Ln1 and Ln2 ions (a), Ln3 and Ln4 ions (b).

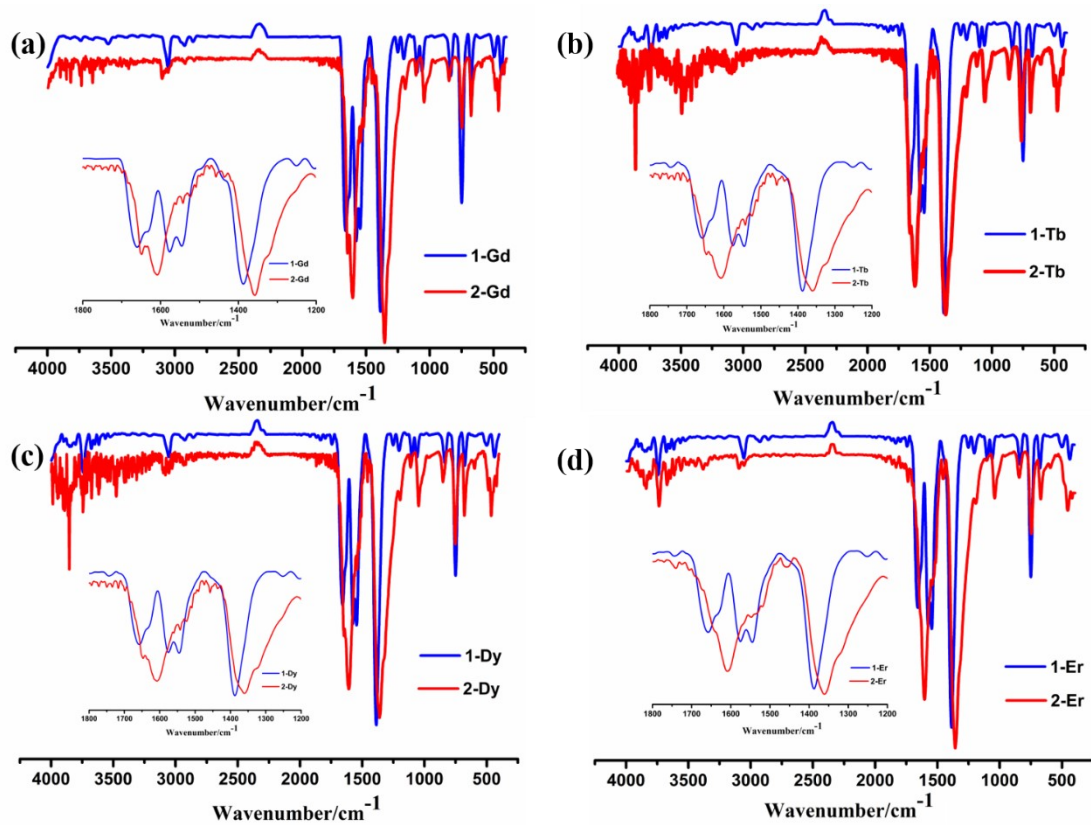

Figure S2. The IR spectra of 1-Ln (a) and 2-Ln (b).

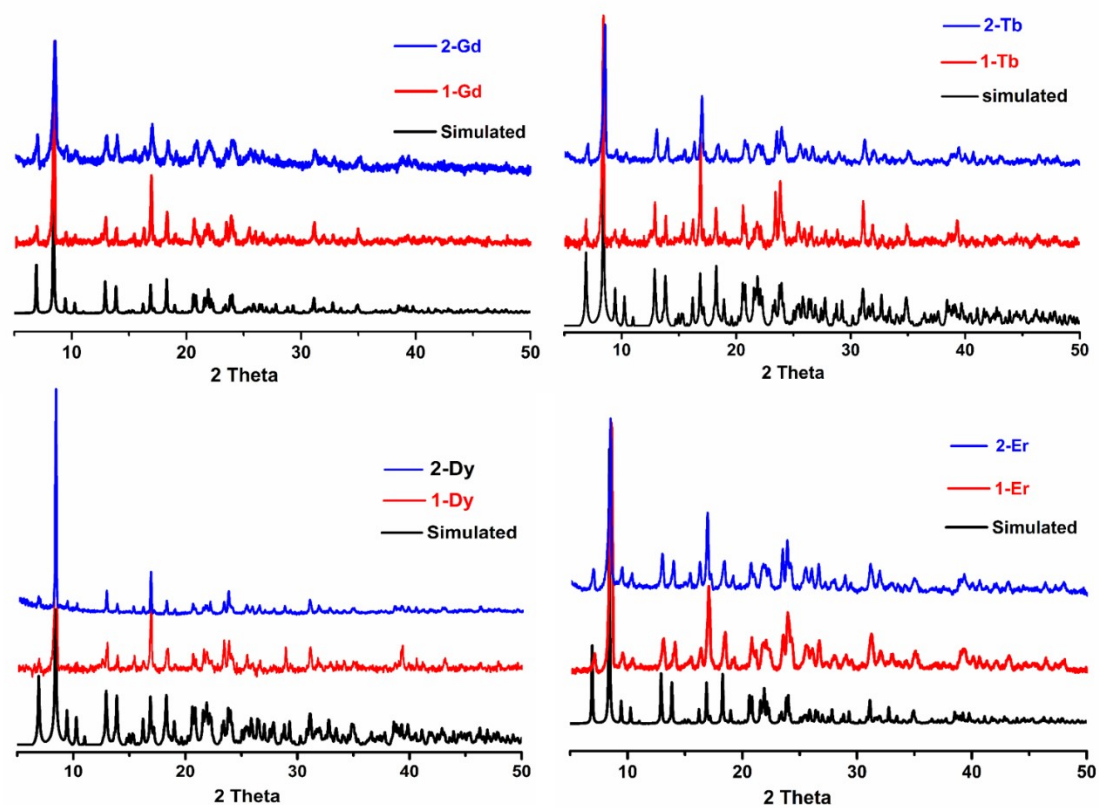

Figure S3. X-ray powder diffraction patterns of 1-Ln and 2-Ln.

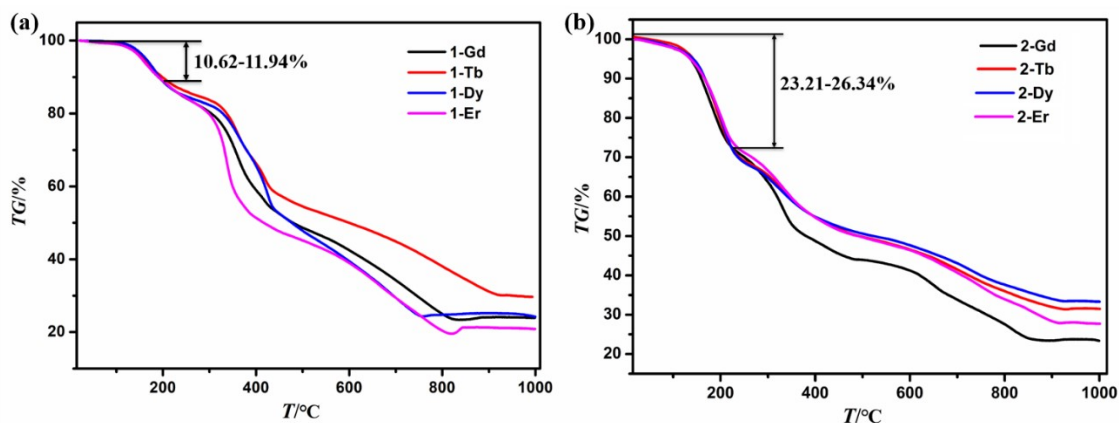

**Figure S4.** The TG plots of **1-Ln** (a) and **2-Ln** (b).

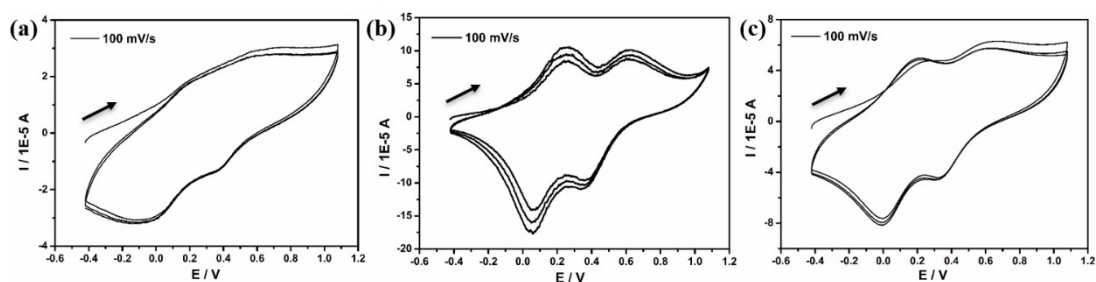

**Figure S5.** The cyclic voltammetry curve of crystal **1-Gd**, **1-Tb** and **1-Er** (vs.  $\text{Fc}/\text{Fc}^+$ ) three forward scans.

The arrow represents the scanning direction.

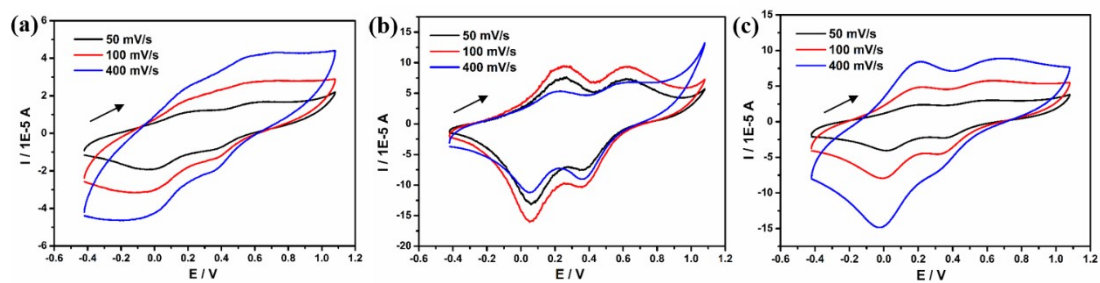

**Figure S6.** The cyclic voltammetry of crystal **1-Gd**, **1-Tb** and **1-Er** performed over different scan rates.

The arrow represents the scanning direction.

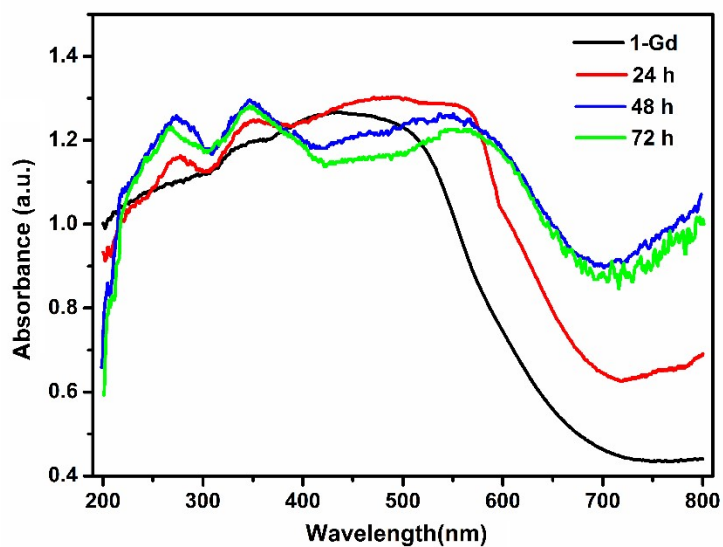

**Figure S7.** The solid-state UV/vis absorption spectra of **1-Gd** immersed in I<sub>2</sub> cyclohexane solution of iodine for different time.

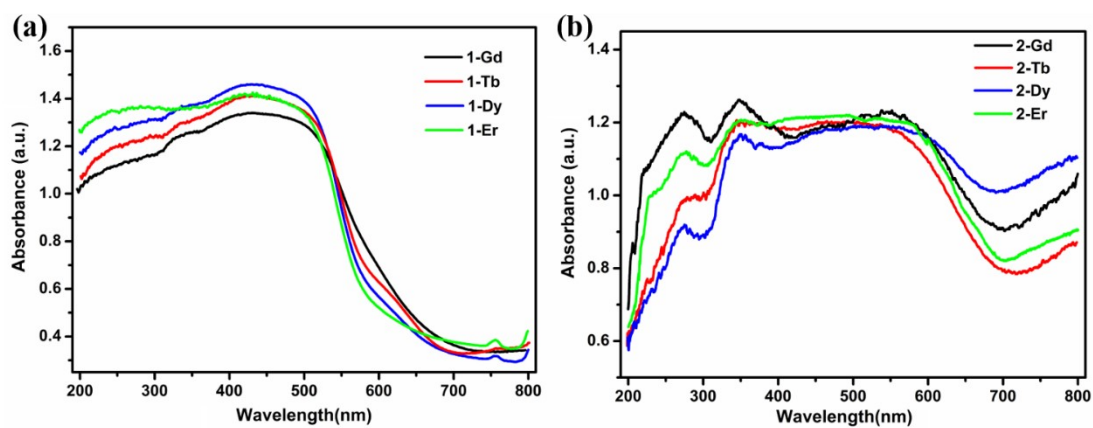

**Figure S8.** The solid-state UV/vis absorption spectrum of **1-Ln** (a) and **2-Ln** (b).

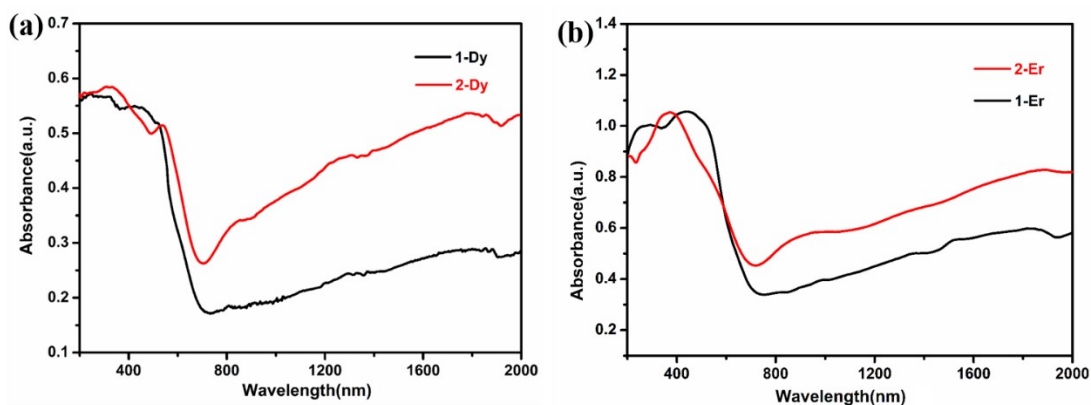

**Figure S9.** The solid-state UV-vis-NIR spectra of **1-Dy** and **2-Dy** (a), **1-Er** and **2-Er** (b).

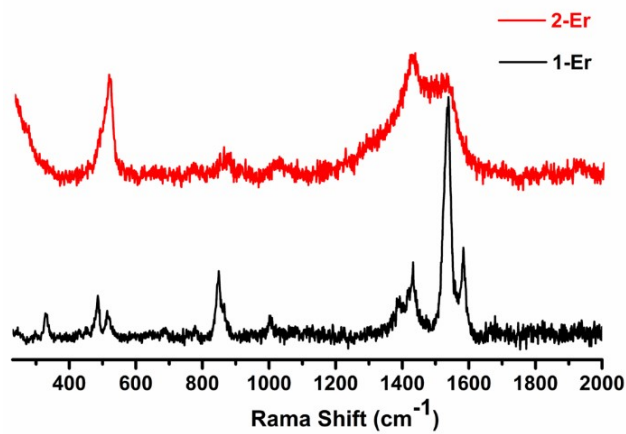

Figure S10. Raman spectra of 1-Er and 2-Er.

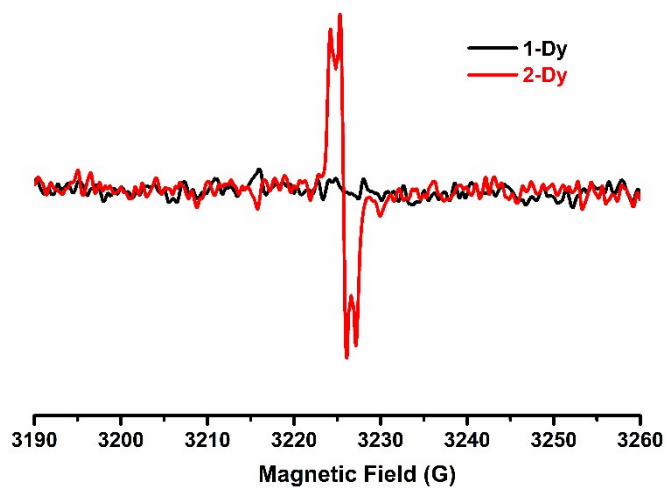

Figure S11. The Solid-state EPR spectra of 1-Dy and 2-Dy at room temperature.

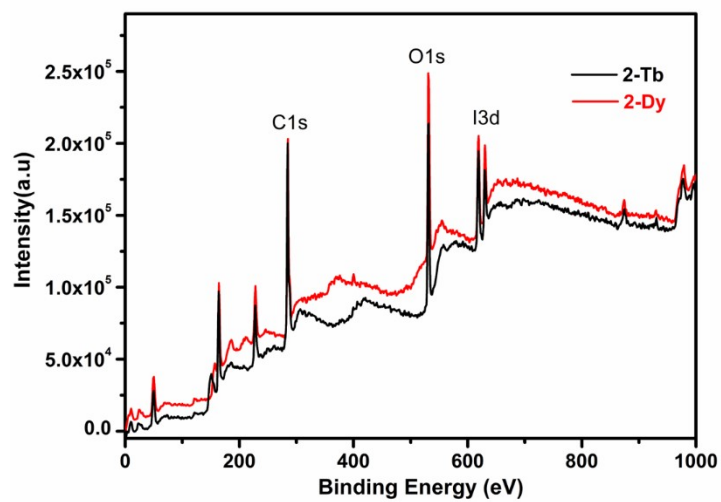

Figure S12. The XPS survey spectra of 2-Tb and 2-Dy.

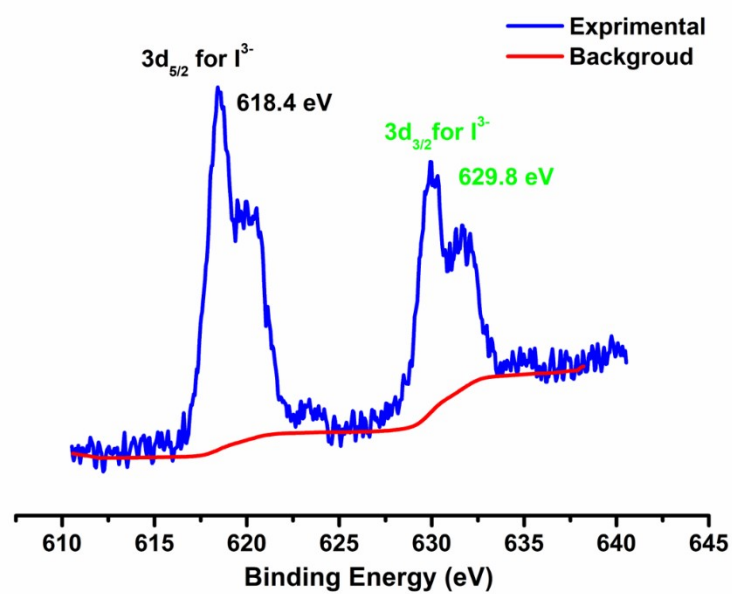

Figure S13. The XPS spectra for I3d with deconvolution of corresponding XPS peaks in 2-Tb.

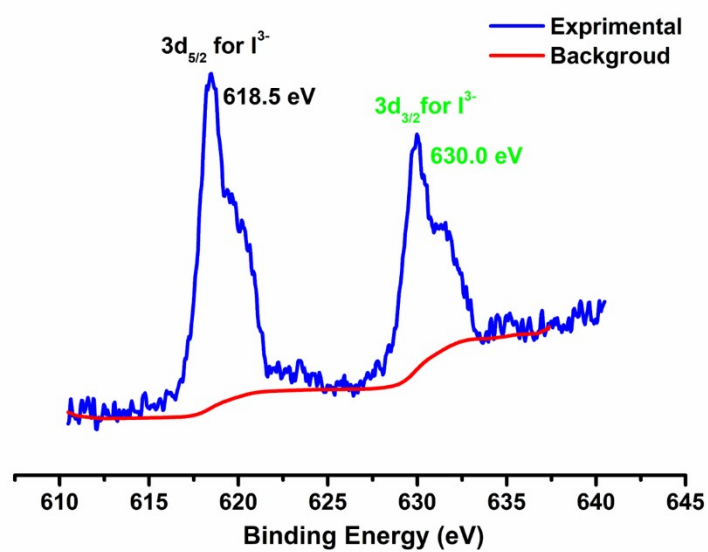

Figure S14. The XPS spectra for I3d with deconvolution of corresponding XPS peaks in 2-Dy.

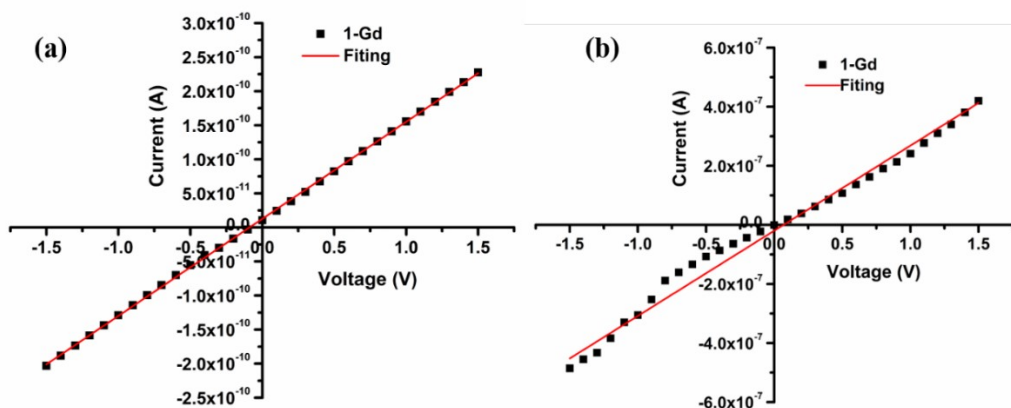

Figure S15. I-V curves of 1-Gd (a) and 2-Gd (b).

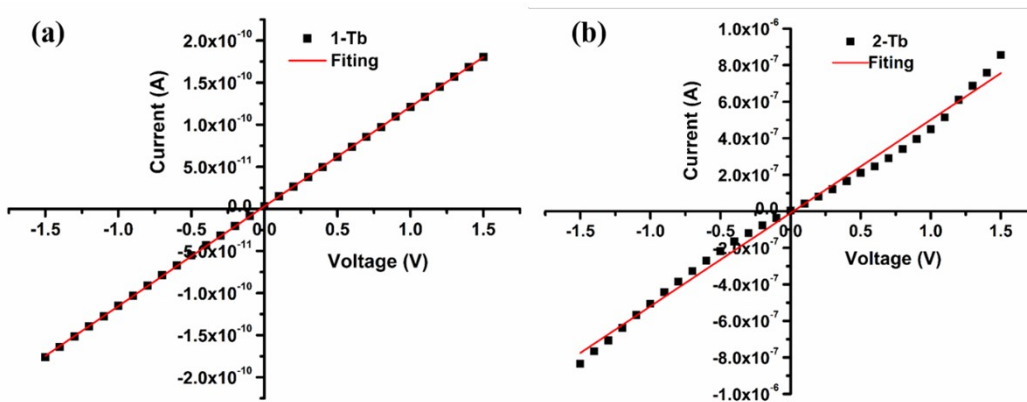

Figure S16. I-V curves of 1-Tb (a) and 2-Tb (b).

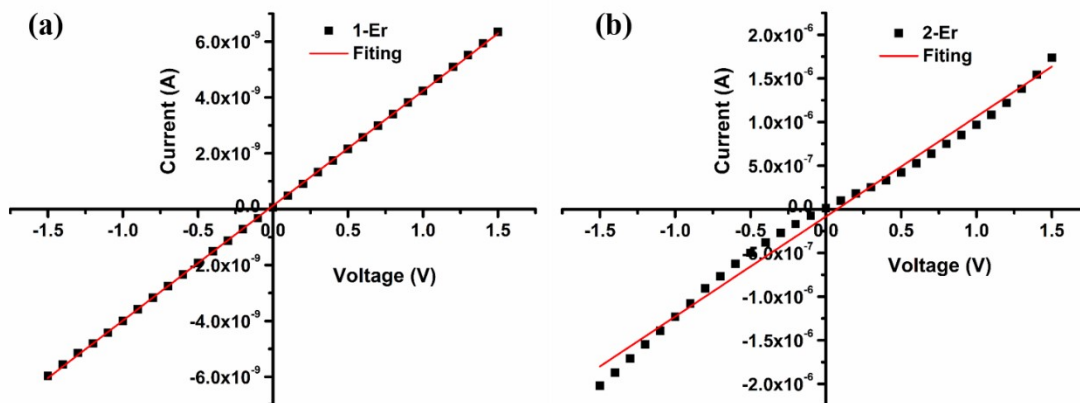

Figure S17. I-V curves of 1-Er (a) and 2-Er (b).

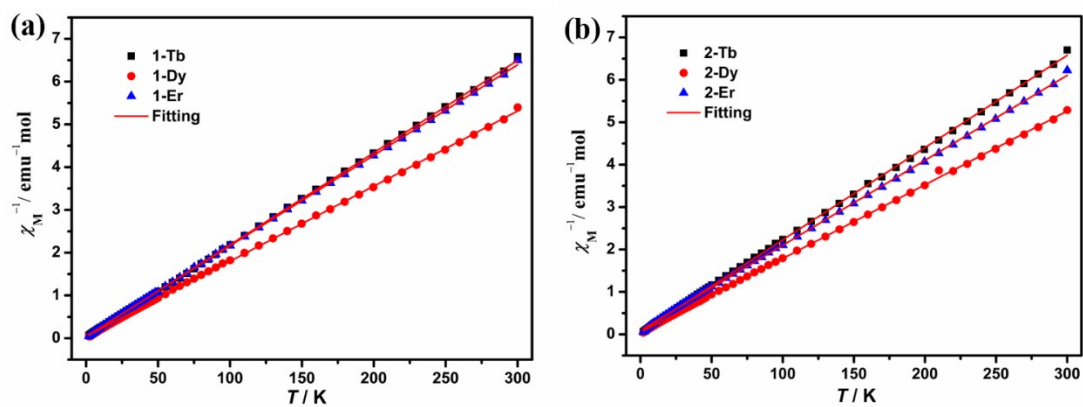

Figure S18.  $\chi_M^{-1}$  vs  $T$  plots of MOFs 1-Ln (a) and 2-Ln (b). Red lines for the Curie-Weiss fitting.

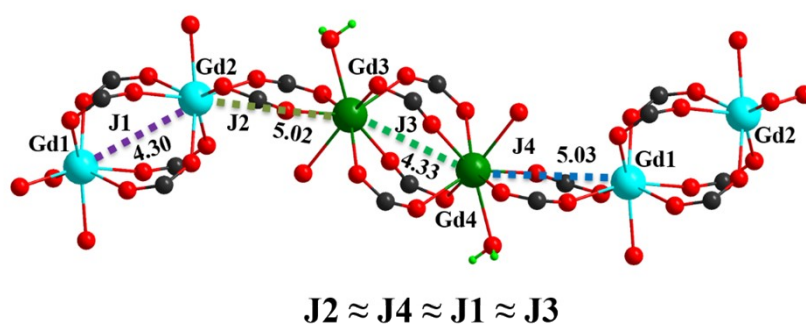

Figure S19. Four kinds of exchange interactions in one dimensional chain of 1-Gd.

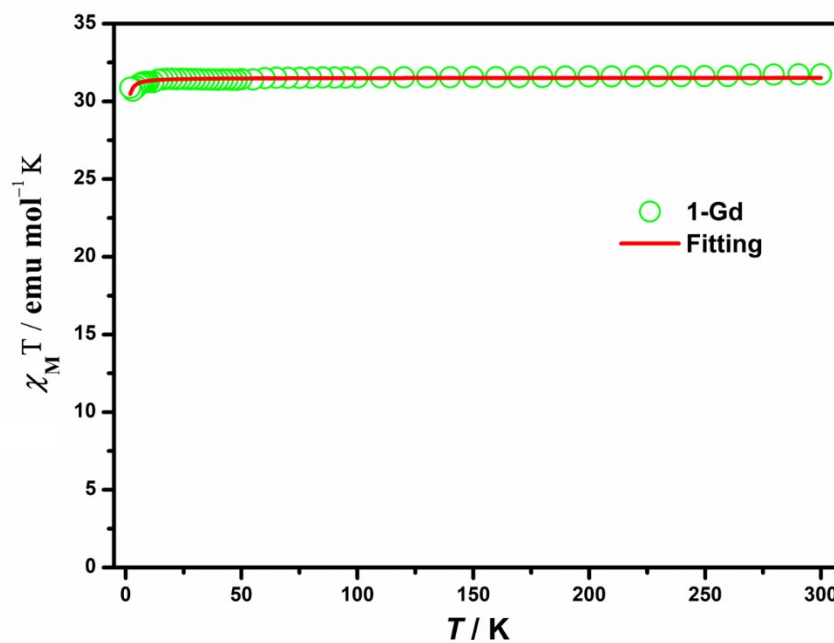

Figure S20. Plots of  $\chi_M T$  vs  $T$  for 1-Gd. The red line is the simulation of  $Gd_4$  cluster only existing magnetic coupling.



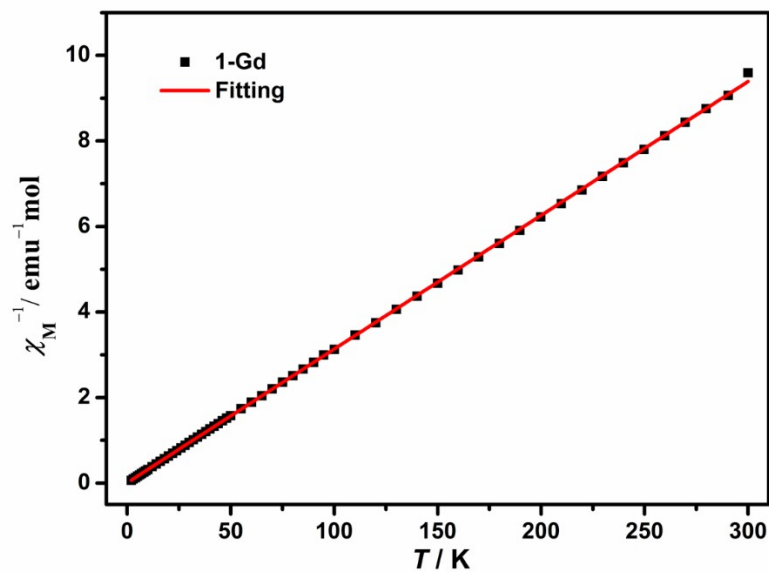

Figure S21.  $\chi_M^{-1}$  vs  $T$  plots of **1-Gd**.

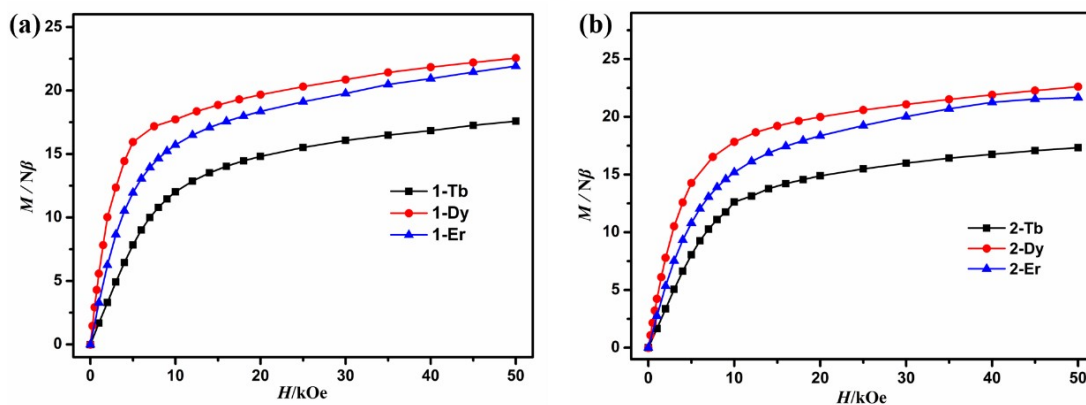

Figure S22. The  $M$  vs  $H$  curves of **1-Tb**, **1-Dy** and **1-Er** (a), **2-Tb**, and **2-Dy** and **2-Er** (b) at 2 K.

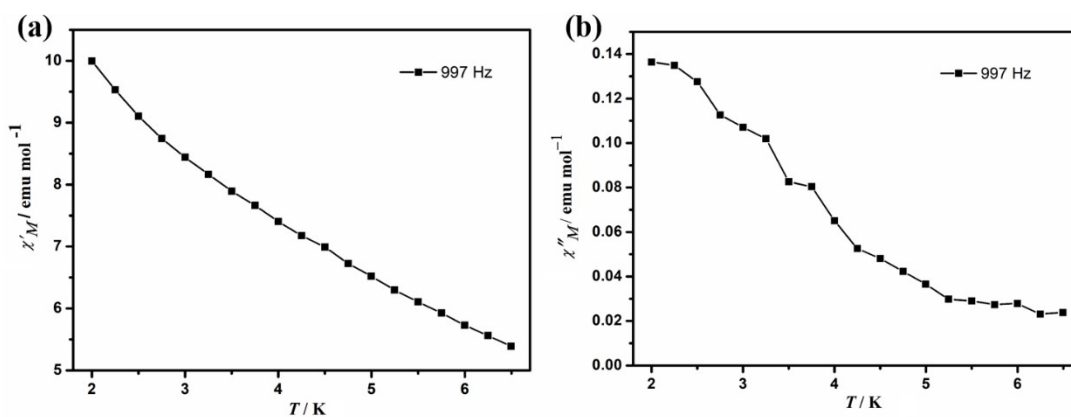

Figure S23. Temperature-dependent in-phase  $\chi'$  (a) and out-of-phase  $\chi''$  (b) ac susceptibility signals for **1-Tb** at the frequency of 997 Hz under zero dc field.

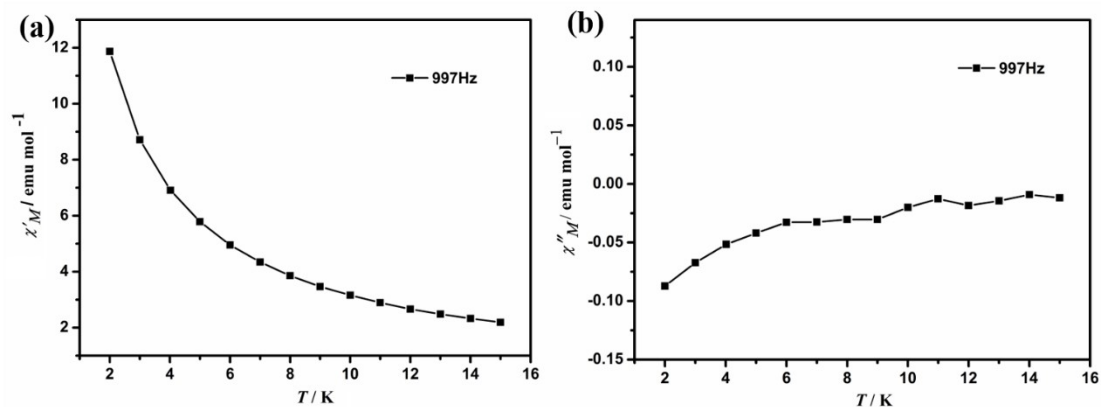

Figure S24. Temperature-dependent in-phase  $\chi'$  (a) and out-of-phase  $\chi''$  (b) ac susceptibility signals for 2-Tb at the frequency of 997 Hz under zero dc field.

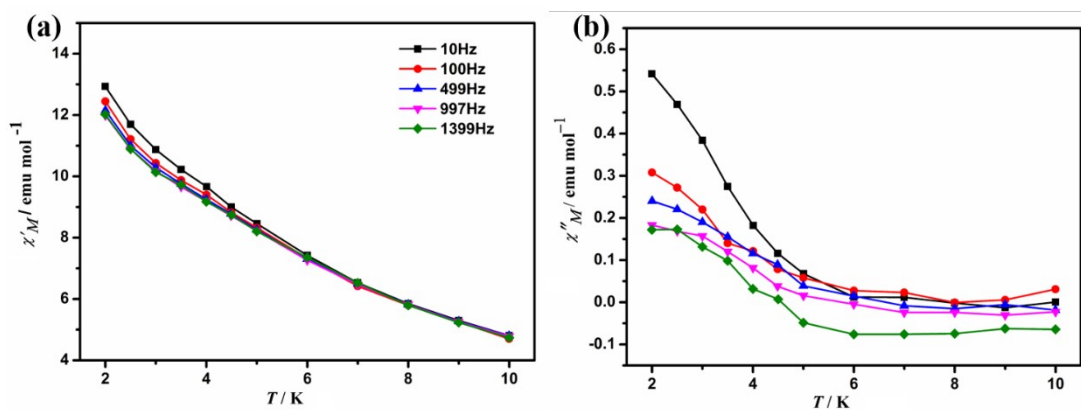

Figure S25. Temperature-dependent in-phase  $\chi'_M$  (a) and out-of-phase  $\chi''_M$  (b) ac susceptibility signals for 1-Tb under 2 kOe dc field.

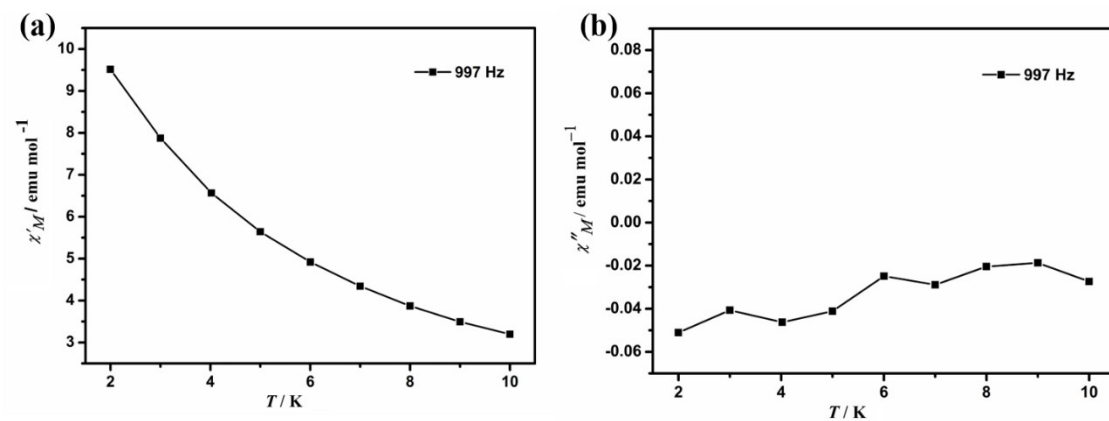

Figure S26. Temperature-dependent in-phase  $\chi'$  (a) and out-of-phase  $\chi''$  (b) ac susceptibility signals for 2-Tb at the frequency of 997 Hz under 2 kOe dc field.

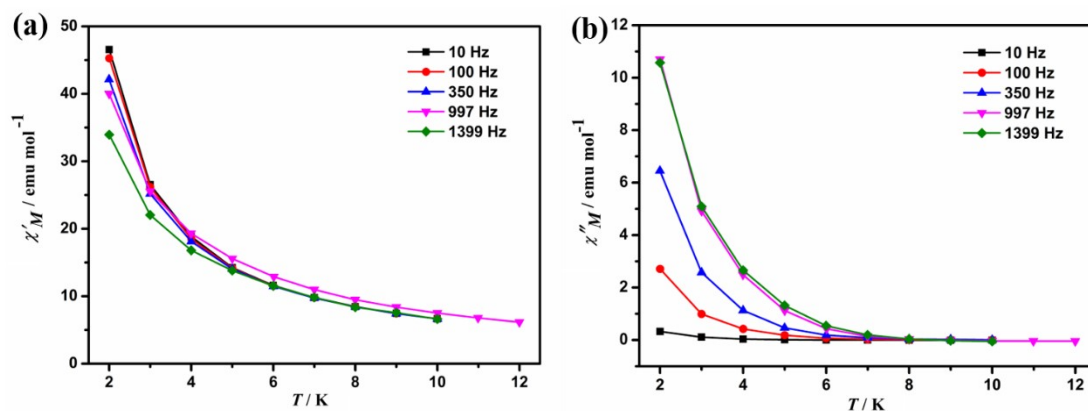

**Figure S27.** Temperature-dependent in-phase  $\chi'$  (a) and out-of-phase  $\chi''$  (b) ac susceptibility signals for **1-Dy** under zero dc field.

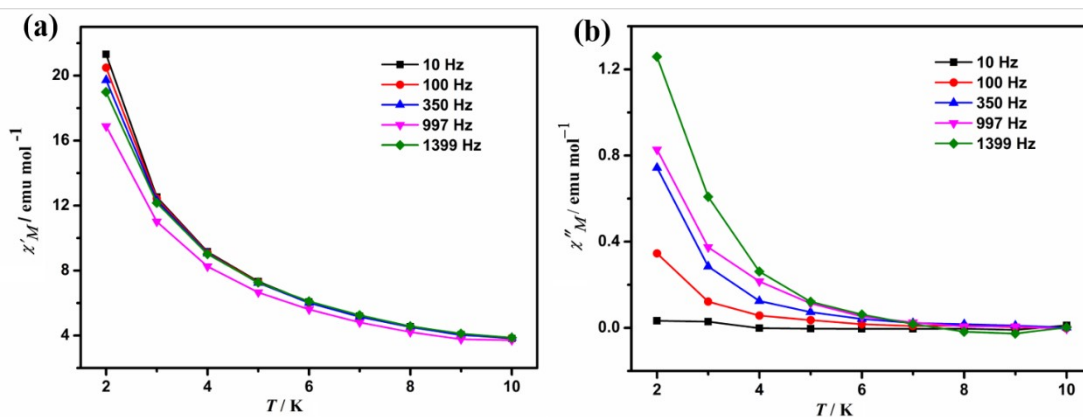

**Figure S28.** Temperature-dependent in-phase  $\chi'$  (a) and out-of-phase  $\chi''$  (b) ac susceptibility signals for **2-Dy** under zero dc field.

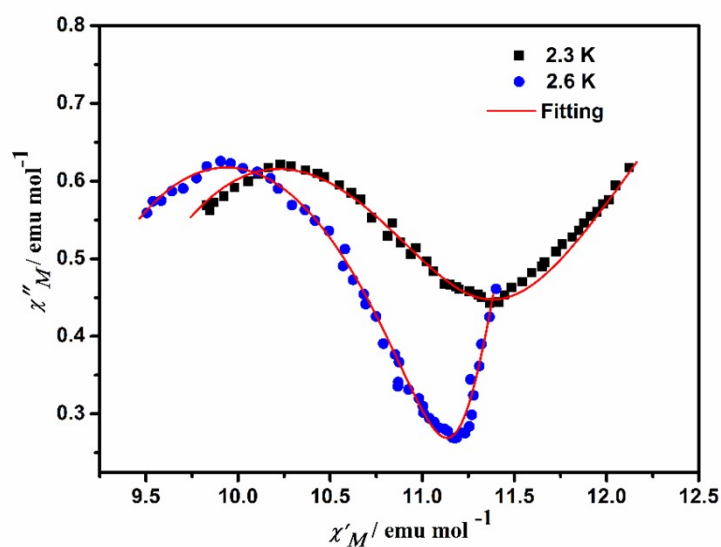

**Figure S29.** Cole-Cole plots for **2-Dy** under 1.5 kOe dc field. Solid lines represent the best fits to the one generalized Debye model.

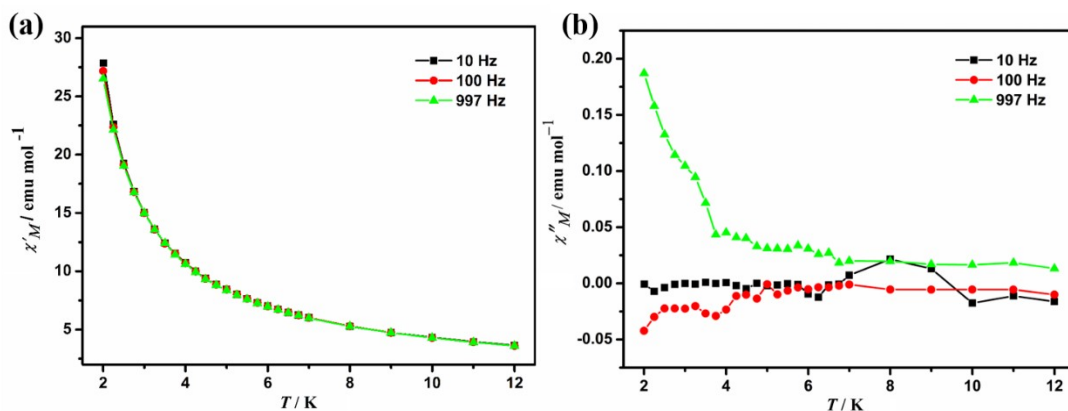

Figure S30. Temperature-dependent in-phase  $\chi'$  (a) and out-of-phase  $\chi''$  (b) ac susceptibility signals for **1-Er** under zero dc field.

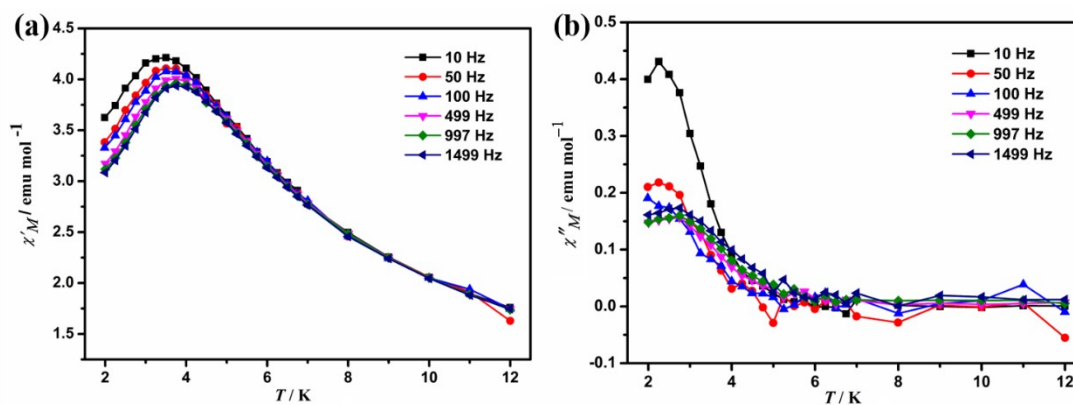

Figure S31. Temperature-dependent in-phase  $\chi'_M$  (a) and out-of-phase  $\chi''_M$  (b) ac susceptibility signals for **1-Er** under 2 kOe dc field.

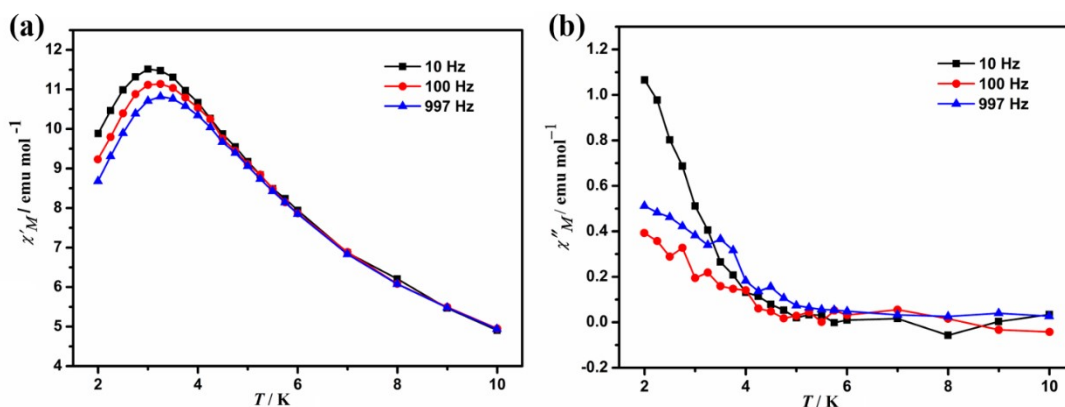

Figure S32. Temperature-dependent in-phase  $\chi'_M$  (a) and out-of-phase  $\chi''_M$  (b) ac susceptibility signals for **2-Er** under 2 kOe dc field.

**Table S1.** Calculated values of elements with different oxidation degrees and test values of elemental analysis.

|             | I (%) |      |      |       | II (%) |      |      |       | Found (%) |      |      |       |
|-------------|-------|------|------|-------|--------|------|------|-------|-----------|------|------|-------|
|             | C     | N    | H    | S     | C      | N    | H    | S     | C         | N    | H    | S     |
| <b>2-Gd</b> | 20.80 | 1.60 | 1.28 | 22.19 | 18.74  | 1.50 | 1.15 | 19.99 | 19.73     | 1.78 | 1.45 | 20.97 |
| <b>2-Tb</b> | 20.78 | 1.62 | 1.27 | 22.18 | 18.72  | 1.46 | 1.14 | 19.96 | 20.73     | 1.81 | 1.78 | 23.14 |
| <b>2-Dy</b> | 20.66 | 1.61 | 1.26 | 22.04 | 18.63  | 1.45 | 1.14 | 19.87 | 20.43     | 1.52 | 1.62 | 21.78 |
| <b>2-Er</b> | 20.54 | 1.59 | 1.23 | 21.81 | 18.45  | 1.44 | 1.13 | 19.78 | 20.29     | 1.82 | 1.86 | 22.44 |

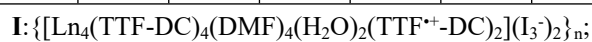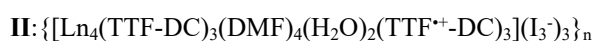

**Table S1.** The weight loss value and TG analysis value of different oxidation degree between 100 and 240°C

|             | I (%) | II (%) | TG (%) |
|-------------|-------|--------|--------|
| <b>2-Gd</b> | 23.06 | 30.70  | 25.21  |
| <b>2-Tb</b> | 23.02 | 30.64  | 26.13  |
| <b>2-Dy</b> | 22.90 | 30.50  | 26.34  |
| <b>2-Er</b> | 22.67 | 30.21  | 23.21  |

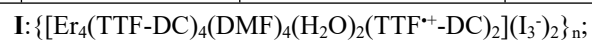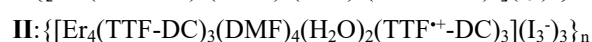

**Table S3.** Elemental analysis of **1-Gd** immersion time in cyclohexane solution of iodine (0.1 M).

|   | 0 h (%) | 24 h (%) | 48 h (%) | 72 h (%) |
|---|---------|----------|----------|----------|
| C | 27.86   | 23.33    | 19.73    | 19.98    |
| N | 3.39    | 2.12     | 1.78     | 1.69     |
| H | 2.31    | 1.86     | 1.45     | 1.41     |

**Table S4.** Selected bond lengths (Å) and angles (°) for **1-Gd**

|                                             |           |                                              |           |
|---------------------------------------------|-----------|----------------------------------------------|-----------|
| Gd01—O00T <sup>#1</sup>                     | 2.492 (6) | Gd02—O3 <sup>#4</sup>                        | 2.378 (6) |
| Gd01—O00U                                   | 2.379 (6) | Gd02—O00Z <sup>#5</sup>                      | 2.361 (6) |
| Gd01—O00W                                   | 2.338 (6) | Gd02—O010 <sup>#6</sup>                      | 2.410 (6) |
| Gd01—O00Y <sup>#2</sup>                     | 2.429 (6) | Gd02—O011 <sup>#6</sup>                      | 2.478 (6) |
| Gd01—O01C <sup>#3</sup>                     | 2.420 (6) | Gd02—O013 <sup>#7</sup>                      | 2.427 (6) |
| Gd01—O01D                                   | 2.344 (7) | Gd02—O018                                    | 2.338 (7) |
| Gd01—O01 <sup>#1</sup>                      | 2.510 (7) | Gd02—O01G                                    | 2.499 (7) |
| Gd01—O01L                                   | 2.531 (7) | Gd02—O01J                                    | 2.510 (7) |
| Gd03—O4                                     | 2.316 (6) | Gd04—O5                                      | 2.321 (6) |
| Gd03—O00X <sup>#6</sup>                     | 2.411 (6) | Gd04—O012 <sup>#6</sup>                      | 2.400 (6) |
| Gd03—O014 <sup>#8</sup>                     | 2.397 (6) | Gd04—O01A                                    | 2.315 (6) |
| Gd03—O015 <sup>#6</sup>                     | 2.408 (6) | Gd04—O01B                                    | 2.270 (6) |
| Gd03—O016                                   | 2.287 (6) | Gd04—O01E <sup>#6</sup>                      | 2.431 (7) |
| Gd03—O017                                   | 2.323 (6) | Gd04—O01F <sup>#1x</sup>                     | 2.382 (6) |
| Gd03—O01Q                                   | 2.379 (8) | Gd04—O5                                      | 2.321 (6) |
| O00T <sup>#1</sup> —Gd01—O01 <sup>#1</sup>  | 137.4 (2) | O3 <sup>#4</sup> —Gd02—O010 <sup>#6</sup>    | 80.5 (2)  |
| O00U—Gd01—O00T <sup>#1</sup>                | 125.1 (2) | O00Z <sup>#5</sup> —Gd02—O3 <sup>#4</sup>    | 71.1 (2)  |
| O00W—Gd01—O00T <sup>#1</sup>                | 79.6 (2)  | O010 <sup>#6</sup> —Gd02—O011 <sup>#6</sup>  | 73.5 (2)  |
| O00Y <sup>#2</sup> —Gd01—O00T <sup>#1</sup> | 73.8 (2)  | O011 <sup>#6</sup> —Gd02—O01G                | 136.8 (2) |
| O01C <sup>#3</sup> —Gd01—O00T <sup>#1</sup> | 144.8 (2) | O013 <sup>#7</sup> —Gd02—O011 <sup>#6</sup>  | 145.5 (2) |
| O01D—Gd01—O00T <sup>#1</sup>                | 79.7 (2)  | O018—Gd02—O3 <sup>#4</sup>                   | 146.3 (2) |
| O01 <sup>#1</sup> —Gd01—O01L                | 124.9 (3) | O01G—Gd02—O01J                               | 125.9 (3) |
| O4—Gd03—O00X <sup>#6</sup>                  | 78.0 (2)  | O2—Gd04—O012 <sup>#6</sup>                   | 73.3 (3)  |
| O014 <sup>#8</sup> —Gd03—O00X <sup>#6</sup> | 147.1 (2) | O5—Gd04—O2                                   | 146.6 (3) |
| O015 <sup>#6</sup> —Gd03—O00X <sup>#6</sup> | 73.8 (2)  | O012 <sup>#6</sup> —Gd04—O01E <sup>#6</sup>  | 73.4 (2)  |
| O016—Gd03—O4                                | 158.9 (3) | O01A—Gd04—O2                                 | 79.4 (4)  |
| O017—Gd03—O00X <sup>#6</sup>                | 124.1 (2) | O01B—Gd04—O2                                 | 80.2 (3)  |
| O01Q—Gd03—O00X <sup>#6</sup>                | 73.1 (3)  | O01F <sup>#1x</sup> —Gd04—O012 <sup>#6</sup> | 147.2 (3) |

Symmetry codes: (#1)  $x, y, z+1$ ; (#2)  $-x+1, -y+2, -z+3$ ; (#3)  $-x+1/2, y+1/2, -z+3/2$ ; (#4)  $-x+1, -y+1, -z$ ; (#5)  $x, y-1, z-2$ ; (#6)  $-x+1, -y+1, -z+1$ ; (#7)  $-x+1/2, y-1/2, -z+1/2$ ; (#8)  $-x+1/2, y-1/2, -z+3/2$ .

**Table S5.** Selected bond lengths (Å) and angles (°) for **1-Tb**

|                                          |           |                                          |           |
|------------------------------------------|-----------|------------------------------------------|-----------|
| Tb1—O27 <sup>#1</sup>                    | 2.497 (6) | Tb2—O2                                   | 2.336 (7) |
| Tb1—O3 <sup>#2</sup>                     | 2.404 (6) | Tb2—O26 <sup>#5</sup>                    | 2.378 (6) |
| Tb1—O4                                   | 2.337 (7) | Tb2—O6 <sup>#6</sup>                     | 2.404 (6) |
| Tb1—O5                                   | 2.506 (7) | Tb2—O9 <sup>#2</sup>                     | 2.465 (6) |
| Tb1—O11                                  | 2.377 (6) | Tb2—O14                                  | 2.358 (6) |
| Tb1—O12                                  | 2.522 (7) | Tb2—O15                                  | 2.511 (7) |
| Tb1—O22 <sup>#3</sup>                    | 2.411 (6) | Tb2—O17                                  | 2.496 (7) |
| Tb1—O32 <sup>#4</sup>                    | 2.324 (6) | Tb2—O31 <sup>#7</sup>                    | 2.414 (6) |
| O28—Tb3 <sup>#6</sup>                    | 2.373 (6) | Tb4—O7                                   | 2.367 (8) |
| Tb3—O13 <sup>#8</sup>                    | 2.389 (6) | Tb4—O16 <sup>#1</sup>                    | 2.376 (7) |
| Tb3—O19                                  | 2.323 (7) | Tb4—O18 <sup>#6</sup>                    | 2.437 (7) |
| Tb3—O20                                  | 2.315 (6) | Tb4—O21 <sup>#6</sup>                    | 2.393 (6) |
| Tb3—O23                                  | 2.270 (7) | Tb4—O25 <sup>#6</sup>                    | 2.303 (6) |
| Tb3—O24                                  | 2.384 (6) | Tb4—O30                                  | 2.257 (7) |
| O1—Tb3                                   | 2.369 (8) | O29—Tb4                                  | 2.311 (7) |
| O27 <sup>#1</sup> —Tb1—O5                | 137.3 (2) | O2—Tb2—O26 <sup>#5</sup>                 | 146.3 (2) |
| O3 <sup>#2</sup> —Tb1—O27 <sup>#1</sup>  | 73.3 (2)  | O26 <sup>#5</sup> —Tb2—O6 <sup>#6</sup>  | 80.3 (2)  |
| O4—Tb1—O27 <sup>#1</sup>                 | 79.7 (2)  | O6 <sup>#6</sup> —Tb2—O9 <sup>#2</sup>   | 73.0 (2)  |
| O5—Tb1—O12                               | 125.6 (3) | O9 <sup>#2</sup> —Tb2—O15                | 74.2 (2)  |
| O11—Tb1—O27 <sup>#1</sup>                | 124.9 (2) | O14—Tb2—O26 <sup>#5</sup>                | 70.9 (2)  |
| O22 <sup>#3</sup> —Tb1—O27 <sup>#1</sup> | 144.9 (2) | O17—Tb2—O15                              | 126.4 (2) |
| O32 <sup>#4</sup> —Tb1—O27 <sup>#1</sup> | 80.1 (2)  | O31 <sup>#7</sup> —Tb2—O9 <sup>#2</sup>  | 145.7 (2) |
| O1—Tb3—O28 <sup>#6</sup>                 | 73.0 (3)  | O16 <sup>#1</sup> —Tb4—O18 <sup>#6</sup> | 139.9 (2) |
| O28 <sup>#6</sup> —Tb3—O13 <sup>#8</sup> | 147.0 (2) | O21 <sup>#6</sup> —Tb4—O18 <sup>#6</sup> | 72.7 (2)  |
| O19—Tb3—O1                               | 78.9 (3)  | O25 <sup>#6</sup> —Tb4—O29               | 78.6 (3)  |
| O20—Tb3—O1                               | 147.5 (3) | O30—Tb4—O29                              | 118.7 (3) |
| O23—Tb3—O1                               | 79.8 (3)  | O7—Tb4—O16 <sup>#1</sup>                 | 78.1 (3)  |
| O24—Tb3—O13 <sup>#8</sup>                | 139.5 (2) | O29—Tb4—O7                               | 147.1 (3) |

Symmetry codes: (#1) -x+1, -y+2, -z+1; (#2) -x+1, -y+2, -z; (#3) -x+1/2, y+1/2, -z+1/2; (#4) x, y+1, z-2; (#5) x, y, z-1; (#6) -x+1, -y+1, -z+2; (#7) -x+1/2, y+1/2, -z+3/2; (#8) -x+1/2, y-1/2, -z+1/2.

**Table S6.** Selected bond lengths (Å) and angles (°) for **1-Dy**

|                                             |             |                                             |             |
|---------------------------------------------|-------------|---------------------------------------------|-------------|
| Dy01—O00T                                   | 2.286 (5)   | Dy02—O00U <sup>#2</sup>                     | 2.350 (5)   |
| Dy01—O00 <sup>#5</sup>                      | 2.342 (5)   | Dy02—O00Y                                   | 2.380 (5)   |
| Dy01—O00W <sup>#1</sup>                     | 2.388 (5)   | Dy02—O011                                   | 2.431 (5)   |
| Dy01—O010 <sup>#2</sup>                     | 2.453 (5)   | Dy02—O016 <sup>#1</sup>                     | 2.302 (5)   |
| Dy01—O01C <sup>#3</sup>                     | 2.379 (5)   | Dy02—O019                                   | 2.291 (5)   |
| Dy01—O01E                                   | 2.292 (5)   | Dy02—O01B <sup>#4</sup>                     | 2.366 (5)   |
| Dy01—O01J                                   | 2.483 (6)   | Dy02—O01H                                   | 2.474 (5)   |
| Dy01—O01L                                   | 2.480 (6)   | Dy02—O01 <sup>#1</sup>                      | 2.468 (6)   |
| Dy03—O3                                     | 2.330 (6)   | Dy04—O5                                     | 2.356 (5)   |
| Dy03—O4                                     | 2.273 (5)   | Dy04—O00X <sup>#6</sup>                     | 2.248 (5)   |
| Dy03—O00Z                                   | 2.306 (5)   | Dy04—O012                                   | 2.301 (5)   |
| Dy03—O013                                   | 2.236 (5)   | Dy04—O015                                   | 2.375 (5)   |
| Dy03—O018                                   | 2.391 (5)   | Dy04—O01D <sup>#7</sup>                     | 2.358 (5)   |
| Dy03—O01F <sup>#5</sup>                     | 2.345 (5)   | Dy04—O01M                                   | 2.339 (6)   |
| O2—Dy03                                     | 2.354 (5)   | O1—Dy04                                     | 2.276 (5)   |
| O00T—Dy01—O00 <sup>#5</sup>                 | 72.76 (19)  | O00U <sup>#2</sup> —Dy02—O00Y               | 79.78 (17)  |
| O00 <sup>#5</sup> —Dy01—O00W <sup>#1</sup>  | 79.92 (18)  | O00Y—Dy02—O011                              | 72.72 (18)  |
| O00W <sup>#1</sup> —Dy01—O010 <sup>#2</sup> | 72.89 (17)  | O011—Dy02—O01H                              | 136.85 (18) |
| O010 <sup>#2</sup> —Dy01—O01J               | 137.01 (18) | O016 <sup>#1</sup> —Dy02—O00U <sup>#2</sup> | 71.72 (18)  |
| O01C <sup>#3</sup> —Dy01—O00W <sup>#1</sup> | 141.46 (18) | O019—Dy02—O00U <sup>#2</sup>                | 145.8 (2)   |
| O01C <sup>#3</sup> —Dy01—O010 <sup>#2</sup> | 145.21 (18) | O01B <sup>#4</sup> —Dy02—O00Y               | 141.15 (18) |
| O01E—Dy01—O00 <sup>#5</sup>                 | 144.4 (2)   | O01 <sup>#1</sup> —Dy02—O01H                | 126.7 (2)   |
| O2—Dy03—O018                                | 72.87 (19)  | O1—Dy04—O5                                  | 79.19 (18)  |
| O3—Dy03—O2                                  | 73.3 (2)    | O5—Dy04—O015                                | 73.20 (19)  |
| O4—Dy03—O2                                  | 79.17 (19)  | O00X <sup>#6</sup> —Dy04—O1                 | 159.5 (2)   |
| O00Z—Dy03—O2                                | 124.90 (19) | O012—Dy04—O5                                | 123.55 (19) |
| O013—Dy03—O2                                | 98.72 (18)  | O01D <sup>#7</sup> —Dy04—O015               | 137.88 (18) |
| O01F <sup>#5</sup> —Dy03—O2                 | 148.30 (19) | O01M—Dy04—O5                                | 73.7 (2)    |

Symmetry codes: (#1)  $-x+1, -y, -z+2$ ; (#2)  $x, y, z+1$ ; (#3)  $-x+1/2, y-1/2, -z+1/2$ ; (#4)  $x+1/2, -y+1/2, z+1/2$ ; (#5)  $x-1/2, -y+1/2, z-1/2$ ; (#6)  $-x+1, -y+1, -z$ ; (#7)  $x+1/2, -y+1/2, z-1/2$ ; (#8)  $-x+1, -y, -z+1$ .

**Table S7.** Selected bond lengths (Å) and angles (°) for **1-Er**



|                             |           |                             |           |
|-----------------------------|-----------|-----------------------------|-----------|
| Er01—O8                     | 2.256 (6) | Er02—O23                    | 2.277 (6) |
| Er01—O5                     | 2.324 (5) | Er02—O21                    | 2.245 (6) |
| Er01—O1                     | 2.360 (6) | Er02—O19                    | 2.331 (6) |
| Er01—O10                    | 2.426 (6) | Er02—O27                    | 2.369 (6) |
| Er01—O31 <sup>#1</sup>      | 2.260 (6) | Er02—O14 <sup>#3</sup>      | 2.202 (6) |
| Er01—O16 <sup>#2</sup>      | 2.350 (6) | Er02—O28 <sup>#4</sup>      | 2.326 (6) |
| Er01—O7                     | 2.471 (7) | Er02—O18                    | 2.309 (7) |
| Er01—O4                     | 2.470 (7) | Er02—O23                    | 2.277 (6) |
| Er03—O11                    | 2.326 (5) | Er04—O20                    | 2.278 (6) |
| Er03—O2                     | 2.277 (6) | Er04—O24                    | 2.334 (6) |
| Er03—O9                     | 2.352 (5) | Er04—O17 <sup>#7</sup>      | 2.220 (6) |
| Er03—O13 <sup>#5</sup>      | 2.345 (6) | Er04—O26                    | 2.243 (6) |
| Er03—O29 <sup>#6</sup>      | 2.256 (6) | Er04—O30 <sup>#8</sup>      | 2.336 (5) |
| Er03—O6                     | 2.403 (6) | Er04—O25                    | 2.316 (7) |
| Er03—O12                    | 2.451 (6) | Er04—O22                    | 2.352 (6) |
| O8—Er01—O5                  | 73.5 (2)  | O23—Er02—O19                | 124.6 (2) |
| O5—Er01—O1                  | 79.3 (2)  | O21—Er02—O23                | 79.0 (2)  |
| O1—Er01—O10                 | 72.8 (2)  | O19—Er02—O27                | 72.5 (2)  |
| O10—Er01—O7                 | 74.0 (2)  | O14 <sup>#3</sup> —Er02—O23 | 116.5 (2) |
| O31 <sup>#1</sup> —Er01—O5  | 144.0 (2) | O28 <sup>#4</sup> —Er02—O19 | 149.1 (2) |
| O16 <sup>#2</sup> —Er01—O1  | 141.3 (2) | O18—Er02—O19                | 73.4 (3)  |
| O4—Er01—O7                  | 125.6 (3) | O23—Er02—O19                | 124.6 (2) |
| O11—Er03—O9                 | 79.1 (2)  | O20—Er04—O24                | 123.2 (2) |
| O2—Er03—O11                 | 72.1 (2)  | O24—Er04—O30 <sup>#8</sup>  | 149.6 (2) |
| O9—Er03—O6                  | 72.7 (2)  | O17 <sup>#7</sup> —Er04—O20 | 117.9 (2) |
| O13 <sup>#5</sup> —Er03—O9  | 141.3 (2) | O26—Er04—O20                | 78.5 (2)  |
| O29 <sup>#6</sup> —Er03—O11 | 145.8 (2) | O30 <sup>#8</sup> —Er04—O22 | 137.4 (2) |
| O6—Er03—O3                  | 74.2 (2)  | O25—Er04—O24                | 73.8 (3)  |

Symmetry codes: (#1)  $-x+1, -y+1, -z+1$ ; (#2)  $-x+3/2, y+1/2, -z+3/2$ ; (#3)  $x, y, z-1$ ; (#4)  $x+1/2, -y+1/2, z+1/2$ ; (#5)  $x-1/2, -y+1/2, z-1/2$ ; (#6)  $x, y, z+1$ ; (#7)  $-x+1, -y, -z+1$ ; (#8)  $-x+1/2, y-1/2$ .

**Table S8.** SHAPE analyses of the Ln<sup>III</sup> ions in **1-Ln**

| Complex | Metal Ions | Label         | Shape                      | Symmetry                                   | Distortion( $\tau$ ) |
|---------|------------|---------------|----------------------------|--------------------------------------------|----------------------|
| 1-Gd    | Gd1/Gd2    | HP-7          | $D_{7h}$                   | Heptagon                                   | 31.699/31.971        |
|         |            | HPY-7         | $C_{6v}$                   | Hexagonal pyramid                          | 21.063/21.321        |
|         |            | PBPY-7        | $D_{5h}$                   | Pentagonal bipyramid                       | 5.732/5.326          |
|         |            | COC-7         | $C_{3v}$                   | Capped octahedron                          | 0.931/0.988          |
|         |            | <b>CTPR-7</b> | <b><math>C_{2v}</math></b> | <b>Capped trigonal prism</b>               | <b>0.844/0.838</b>   |
|         |            | JPBPY-7       | $D_{5h}$                   | Johnson pentagonal bipyramid J13           | 8.749/8.315          |
|         |            | JETPY-7       | $C_{3v}$                   | Johnson elongated triangular pyramid J7    | 18.506/18.599        |
|         | Gd3/Gd4    | OP-8          | $D_{8h}$                   | Octagon                                    | 28.473/28.635        |
|         |            | HPY-8         | $C_{7v}$                   | Heptagonal pyramid                         | 24.528/24.548        |
|         |            | HBPY-8        | $D_{6h}$                   | Hexagonal bipyramid                        | 16.320/15.916        |
|         |            | CU-8          | $O_h$                      | Cube                                       | 10.404/9.978         |
|         |            | SAPR-8        | $D_{4d}$                   | Square antiprism                           | 1.162/1.177          |
|         |            | TDD-8         | $D_{2d}$                   | Triangular dodecahedron                    | 1.355/1.206          |
|         |            | JGBF-8        | $D_{2d}$                   | Johnson gyrobifastigium J26                | 14.470/14.488        |
|         |            | JETBPY-8      | $D_{3h}$                   | Johnson elongated triangular bipyramid J14 | 28.529/28.381        |
|         |            | JBTPR-8       | $C_{2v}$                   | Biaugmented trigonal prism J50             | 1.171/1.297          |
|         |            | <b>BTPR-8</b> | <b><math>C_{2v}</math></b> | <b>Biaugmented trigonal prism</b>          | <b>0.695/0.812</b>   |
|         |            | JSD-8         | $D_{2d}$                   | Snub diphenoid J84                         | 3.172/3.204          |
|         |            | TT-8          | $T_d$                      | Triakis tetrahedron                        | 10.914/10.538        |
|         |            | ETBPY-8       | $D_{3h}$                   | Elongated trigonal bipyramid               | 24.789/24.640        |
| 1-Tb    | Tb1/Tb2    | HP-7          | $D_{7h}$                   | Heptagon                                   | 31.684/31.697        |
|         |            | HPY-7         | $C_{6v}$                   | Hexagonal pyramid                          | 20.981/21.341        |
|         |            | PBPY-7        | $D_{5h}$                   | Pentagonal bipyramid                       | 5.806/5.327          |
|         |            | COC-7         | $C_{3v}$                   | Capped octahedron                          | 0.894/1.018          |
|         |            | <b>CTPR-7</b> | <b><math>C_{2v}</math></b> | <b>Capped trigonal prism</b>               | <b>0.855/0.871</b>   |
|         |            | JPBPY-7       | $D_{5h}$                   | Johnson pentagonal bipyramid J13           | 8.897/8.225          |
|         |            | JETPY-7       | $C_{3v}$                   | Johnson elongated triangular pyramid J7    | 18.493/18.435        |
|         | Tb3/Tb4    | OP-8          | $D_{8h}$                   | Octagon                                    | 28.287/28.626        |
|         |            | HPY-8         | $C_{7v}$                   | Heptagonal pyramid                         | 24.480/24.472        |
|         |            | HBPY-8        | $D_{6h}$                   | Hexagonal bipyramid                        | 16.420/15.904        |
|         |            | CU-8          | $O_h$                      | Cube                                       | 10.539/10.118        |
|         |            | SAPR-8        | $D_{4d}$                   | Square antiprism                           | 1.149/1.154          |
|         |            | TDD-8         | $D_{2d}$                   | Triangular dodecahedron                    | 1.386/1.279          |
|         |            | JGBF-8        | $D_{2d}$                   | Johnson gyrobifastigium J26                | 14.326/14.315        |
|         |            | JETBPY-8      | $D_{3h}$                   | Johnson elongated triangular bipyramid J14 | 28.550/28.445        |
|         |            | JBTPR-8       | $C_{2v}$                   | Biaugmented trigonal prism                 | 1.187/1.268          |

|               |             |               |          |                                                          |                                  |
|---------------|-------------|---------------|----------|----------------------------------------------------------|----------------------------------|
|               |             |               | J50      |                                                          |                                  |
|               |             | <b>BTPR-8</b> | $C_{2v}$ | <b>Biaugmented trigonal prism</b> <b>0.735/0.829</b>     |                                  |
|               |             | JSD-8         | $D_{2d}$ | Snub diphenoid J84 3.114/3.243                           |                                  |
|               |             | TT-8          | $T_d$    | Triakis tetrahedron 11.005/10.659                        |                                  |
|               |             | ETBPY-8       | $D_{3h}$ | Elongated trigonal bipyramid 24.567/24.608               |                                  |
| <b>1-Dy</b>   | Dy1/Dy2     | HP-7          | $D_{7h}$ | Heptagon 32.246/32.053                                   |                                  |
|               |             | HPY-7         | $C_{6v}$ | Hexagonal pyramid 21.565/21.247                          |                                  |
|               |             | PBPY-7        | $D_{5h}$ | Pentagonal bipyramid 5.196/5.713                         |                                  |
|               |             | COC-7         | $C_{3v}$ | Capped octahedron 0.917/0.831                            |                                  |
|               |             | <b>CTPR-7</b> | $C_{2v}$ | <b>Capped trigonal prism</b> <b>0.848/0.811</b>          |                                  |
|               |             | JPBPY-7       | $D_{5h}$ | Johnson pentagonal bipyramid J13 8.176/8.741             |                                  |
|               |             | JETPY-7       | $C_{3v}$ | Johnson elongated triangular pyramid J7 18.937/18.730    |                                  |
|               | Dy3/Dy4     | OP-8          | $D_{8h}$ | Octagon 28.591/28.546                                    |                                  |
|               |             | HPY-8         | $C_{7v}$ | Heptagonal pyramid 24.327/24.312                         |                                  |
|               |             | HBPY-8        | $D_{6h}$ | Hexagonal bipyramid 16.303/15.956                        |                                  |
|               |             | CU-8          | $O_h$    | Cube 10.491/10.206                                       |                                  |
|               |             | SAPR-8        | $D_{4d}$ | Square antiprism 1.167/1.160                             |                                  |
|               |             | TDD-8         | $D_{2d}$ | Triangular dodecahedron 1.384/1.276                      |                                  |
|               |             | JGBF-8        | $D_{2d}$ | Johnson gyrobifastigium J26 14.380/14.402                |                                  |
|               |             | JETBPY-8      | $D_{3h}$ | Johnson elongated triangular bipyramid J14 28.634/28.401 |                                  |
|               |             | JBTPR-8       | $C_{2v}$ | Biaugmented trigonal prism J50 1.160/1.222               |                                  |
|               |             | <b>BTPR-8</b> | $C_{2v}$ | <b>Biaugmented trigonal prism</b> <b>0.738/0.817</b>     |                                  |
|               |             | JSD-8         | $D_{2d}$ | Snub diphenoid J84 3.146/3.141                           |                                  |
|               |             | TT-8          | $T_d$    | Triakis tetrahedron 10.966/10.712                        |                                  |
|               |             | ETBPY-8       | $D_{3h}$ | Elongated trigonal bipyramid 24.675/24.667               |                                  |
|               | <b>1-Er</b> | Er1/Er2       | HP-7     | $D_{7h}$                                                 | Heptagon 32.380/31.697           |
|               |             |               | HPY-7    | $C_{6v}$                                                 | Hexagonal pyramid 21.526/21.341  |
|               |             |               | PBPY-7   | $D_{5h}$                                                 | Pentagonal bipyramid 5.710/5.327 |
|               |             |               | COC-7    | $C_{3v}$                                                 | Capped octahedron 0.743/1.018    |
| <b>CTPR-7</b> |             |               | $C_{2v}$ | <b>Capped trigonal prism</b> <b>0.863/0.871</b>          |                                  |
| JPBPY-7       |             |               | $D_{5h}$ | Johnson pentagonal bipyramid J13 8.674/8.225             |                                  |
| JETPY-7       |             |               | $C_{3v}$ | Johnson elongated triangular pyramid J7 18.809/18.435    |                                  |
| Er3/Er4       |             | OP-8          | $D_{8h}$ | Octagon 28.803/28.812                                    |                                  |
|               |             | HPY-8         | $C_{7v}$ | Heptagonal pyramid 24.312/24.278                         |                                  |
|               |             | HBPY-8        | $D_{6h}$ | Hexagonal bipyramid 16.201/15.887                        |                                  |
|               |             | CU-8          | $O_h$    | Cube 10.520/10.178                                       |                                  |
|               |             | SAPR-8        | $D_{4d}$ | Square antiprism 1.237/1.203                             |                                  |
|               |             | TDD-8         | $D_{2d}$ | Triangular dodecahedron 1.422/1.276                      |                                  |

|               |          |                                            |                    |
|---------------|----------|--------------------------------------------|--------------------|
| JGBF-8        | $D_{2d}$ | Johnson gyrobifastigium J26                | 14.410/14.395      |
| JETBPY-8      | $D_{3h}$ | Johnson elongated triangular bipyramid J14 | 28.700/28.530      |
| JBTPR-8       | $C_{2v}$ | Biaugmented trigonal prism J50             | 1.073/1.165        |
| <b>BTPR-8</b> | $C_{2v}$ | <b>Biaugmented trigonal prism</b>          | <b>0.724/0.823</b> |
| JSD-8         | $D_{2d}$ | Snub diphenooid J84                        | 3.090/3.103        |
| TT-8          | $T_d$    | Triakis tetrahedron                        | 10.944/10.660      |
| ETBPY-8       | $D_{3h}$ | Elongated trigonal bipyramid               | 24.935/24.870      |

**Table S9.** The fitting parameters  $\alpha$  and  $\tau$  values for **1-Dy** by using CC-FIT software.

| $T$   | $\alpha_1$ | $\tau_1$              | $\alpha_2$ | $\tau_2$ |
|-------|------------|-----------------------|------------|----------|
| 2.0 K | 0.52       | $0.42 \times 10^{-4}$ | 0.24       | 0.39     |
| 2.5 K | 0.52       | $0.49 \times 10^{-4}$ | 0.30       | 0.47     |
| 3 K   | 0.46       | $0.72 \times 10^{-4}$ | 0.39       | 0.62     |

**Table S10.** The fitting parameters  $\alpha$  and  $\tau$  values for **2-Dy** by using CC-FIT software.

| $T$   | $\alpha_1$ | $\tau_1$              | $\alpha_2$ | $\tau_2$ |
|-------|------------|-----------------------|------------|----------|
| 2.3 K | 0.43       | $0.26 \times 10^{-3}$ | 0.65       | 0.20     |
| 2.6 K | 0.44       | $0.32 \times 10^{-3}$ | 0.32       | 0.64     |
